# Supplementary material for: Association of Low-Grade Glioma Diagnosis and Management Approach with Mental Health Disorders: A MarketScan Analysis 2005–2014
Source: MDPI journal article supplement (doi:10.3390/cancers14061376), 2022-03-08
Supplement: s1 [file s1]

# Supplementary Material: Association of Low-Grade Glioma Diagnosis and Management Approach with Mental Health Disorders: A MarketScan Analysis 2005–2014

Debarati Bhanja, Djibril Ba, Kyle Tuohy, Hannah Wilding, Mara Trifoi, Varun Padmanaban, Guodong Liu, Michael Sughrue, Brad Zacharia, Douglas Leslie and Alireza Mansouri\*

**Table S1.** Psychotropic Drugs to Identify Patients with MHDs [43].

| Drug Class                                             | Medications      |
|--------------------------------------------------------|------------------|
| Tricyclic Antidepressants                              | Amitriptyline    |
|                                                        | Amoxapine        |
|                                                        | Clomipramine     |
|                                                        | Doxepin          |
|                                                        | Imipramine       |
|                                                        | Maprotiline      |
|                                                        | Nortriptyline    |
|                                                        | Protriptyline    |
|                                                        | Tramipramine     |
| Monoamine oxidase inhibitors                           | Isocarboxazide   |
|                                                        | Phenelzine       |
|                                                        | Selegiline       |
|                                                        | Tranlycypromine  |
| Selective serotonin reuptake inhibitors                | Citalopram       |
|                                                        | Escitalopram     |
|                                                        | Fluoxetine       |
|                                                        | Fluvoxamine      |
|                                                        | Paroxetine       |
|                                                        | Sertraline       |
| Selective serotonin-norepinephrine reuptake inhibitors | Desvenlafaxine   |
|                                                        | Duloxetine       |
|                                                        | Milnacipran      |
|                                                        | Venlafaxine      |
| Other antidepressants                                  | Bupropion        |
|                                                        | Mirtazapine      |
|                                                        | Trazodone        |
| Benzodiazepines                                        | Alprazolam       |
|                                                        | Bromazepam       |
|                                                        | Chlordiazepoxide |
|                                                        | Clonazepam       |
|                                                        | Clorazepate      |
|                                                        | Clotiazepam      |
|                                                        | Cloxazolam       |
|                                                        | Delorazepam      |
|                                                        | Diazepam         |
|                                                        | Etizolam         |
|                                                        | Halazepam        |
|                                                        | Ketazolam        |
|                                                        | Lorazepam        |
|                                                        | Medazepam        |
|                                                        | Nordazepam       |
|                                                        | Oxazepam         |

|                   |                                                   |
|-------------------|---------------------------------------------------|
|                   | Phenazepam<br>Pinazepam<br>Prazepam<br>Premazepam |
| Other anxiolytics | Bretazenil<br>Buspirone                           |

**Table S2.** Anti-Epileptic Drugs Used to Identify Patients with Glioma-Related Seizures.

| Therapeutic Spectrum    | Medications     |
|-------------------------|-----------------|
| Broad Spectrum Seizures | Brivaracetam    |
|                         | Felbamate       |
|                         | Lamotrigine     |
|                         | Levetiracetam   |
|                         | Perampanel      |
|                         | Rufinamide      |
|                         | Topiramate      |
|                         | Valproate       |
| Narrow Spectrum         | Zonisamide      |
|                         | Carbamazepine   |
|                         | Cenobamate      |
|                         | Eslicarbazepine |
|                         | Gabapentin      |
|                         | Lacosamide      |
|                         | Oxcarbazepine   |
|                         | Phenobarbital   |
|                         | Phenytoin       |
|                         | Pregabalin      |
|                         | Primidone       |
|                         | Stiripentol     |
|                         | Tiagabine       |
|                         | Vigabatrin      |

43. Maurer, R.; McNutt, S.; Daggubati, L.; Ba, D.M.; Liu, G.; Leslie, D.; Goyal, N.; Zacharia, B.E. Mental health disorders in newly diagnosed non-functional pituitary adenoma under initial observation: An observational cohort study using the nationwide MarketScan database. *Pituitary* **2021**, *25*, 86–91.
